# Supplementary material
Source: Springer Nature journal article supplement (https://www.springerprofessional.de/resource/supplementary/13638_2012_767_MOESM3_ESM.pdf/11898388)

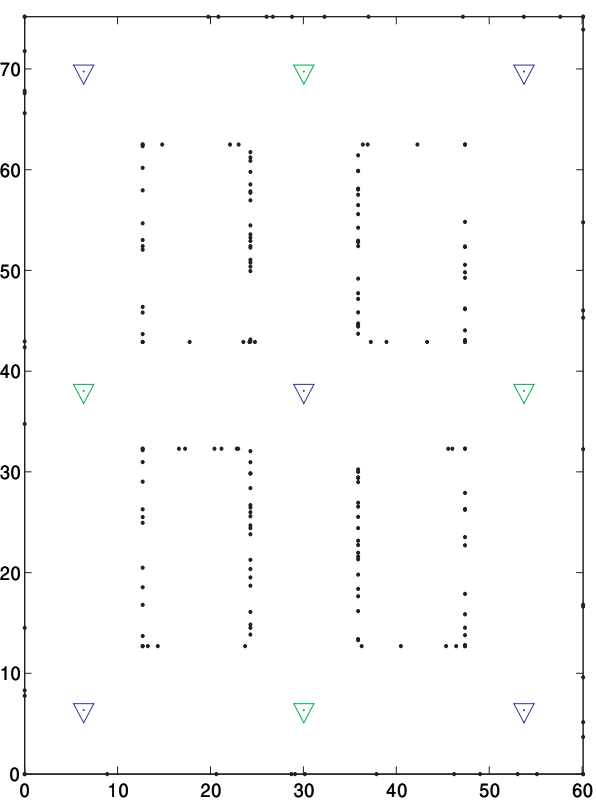

(a) Top view

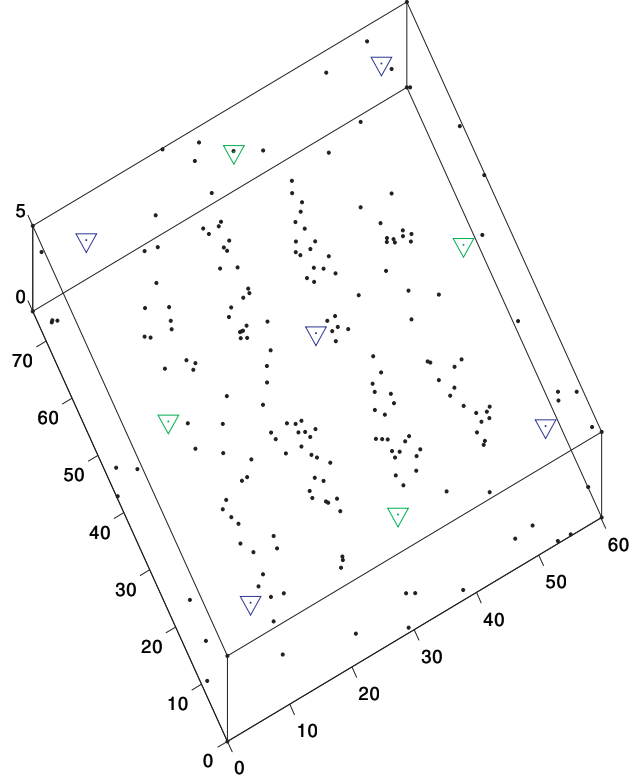

(b) 3-D view

Supplement: MOESM3 [file 11898388]
